# Supplementary material
Source: publisher figshare collection journal article supplement (https://karger.figshare.com/articles/dataset/_/23283119)
Supplement: Supplementary file 1 [file 1]

## Supplementary Table

**Table S1. Two Sample t-test Results – Comparison of Mean Thickness Values Across Cohorts**

| ETDRS Grid     | Sample Mean (SD) |                |               | t-test p-value     |             |                   |
|----------------|------------------|----------------|---------------|--------------------|-------------|-------------------|
|                | RPD              | iAMD & RPD     | iAMD          | iAMD vs iAMD & RPD | RPD vs iAMD | RPD vs iAMD & RPD |
| Central        |                  |                |               |                    |             |                   |
| Retina         | 274.44 (20.05)   | 275.21 (28.57) | 283.7 (27.95) | 0.394              | 0.203       | 0.922             |
| NFL            | 12.32 (1.95)     | 12.07 (3.43)   | 12.5 (4.38)   | 0.762              | 0.866       | 0.806             |
| GCL            | 15.04 (2.94)     | 16 (5.53)      | 15.4 (4.49)   | 0.73               | 0.747       | 0.554             |
| IPL            | 19.76 (2.65)     | 19.86 (5.01)   | 20.3 (4.32)   | 0.785              | 0.627       | 0.947             |
| INL            | 23.68 (3.6)      | 24.07 (6.93)   | 25.3 (6.11)   | 0.589              | 0.303       | 0.846             |
| OPL            | 28.12 (4.82)     | 26.93 (6.06)   | 27.6 (7.13)   | 0.776              | 0.772       | 0.504             |
| ONL            | 87.08 (13.79)    | 84.79 (12.74)  | 86.55 (14.18) | 0.712              | 0.9         | 0.612             |
| RPE            | 18.76 (7.5)      | 21.79 (7.87)   | 28.15 (18.77) | 0.186              | 0.046*      | 0.243             |
| Superior Inner |                  |                |               |                    |             |                   |
| Retina         | 324.56 (23.75)   | 317.07 (20.47) | 333 (19.51)   | 0.028*             | 0.207       | 0.328             |
| NFL            | 18.04 (1.77)     | 19.36 (2.71)   | 18.85 (3.8)   | 0.671              | 0.387       | 0.074             |
| GCL            | 46.76 (9.38)     | 40.93 (9.86)   | 44.35 (7.72)  | 0.265              | 0.36        | 0.075             |
| IPL            | 38.48 (5.61)     | 34.71 (4.87)   | 38.15 (5.68)  | 0.075              | 0.846       | 0.042*            |
| INL            | 39.24 (4.61)     | 38.5 (3.48)    | 41.85 (3)     | 0.005*             | 0.034*      | 0.605             |
| OPL            | 34.84 (5.97)     | 36.14 (6.35)   | 43.65 (11.07) | 0.018*             | 0.003*      | 0.527             |
| ONL            | 64.08 (17.41)    | 61.5 (10.43)   | 57.9 (13.68)  | 0.413              | 0.201       | 0.617             |
| RPE            | 16.24 (2.39)     | 19.71 (7.21)   | 22.05 (9.11)  | 0.43               | 0.011*      | 0.101             |
| Nasal Inner    |                  |                |               |                    |             |                   |
| Retina         | 325.28 (21.59)   | 319.79 (23.47) | 331.6 (18.35) | 0.109              | 0.303       | 0.464             |
| NFL            | 17.4 (1.58)      | 19.36 (4.05)   | 18.9 (4.33)   | 0.758              | 0.154       | 0.103             |
| GCL            | 40.32 (9.1)      | 35.86 (10.08)  | 38.75 (7.96)  | 0.357              | 0.547       | 0.166             |
| IPL            | 37.72 (5.58)     | 34.07 (5.89)   | 36.7 (5.32)   | 0.184              | 0.537       | 0.062             |
| INL            | 37.96 (4.76)     | 38.29 (4.45)   | 40.7 (4.21)   | 0.117              | 0.05*       | 0.835             |
| OPL            | 34.64 (8.47)     | 39.5 (13.35)   | 39.05 (11.02) | 0.915              | 0.136       | 0.172             |
| ONL            | 74.04 (17.66)    | 66.71 (16.21)  | 70 (13.53)    | 0.525              | 0.404       | 0.209             |
| RPE            | 16.04 (2.52)     | 19.21 (6.97)   | 20.35 (7.42)  | 0.656              | 0.021*      | 0.121             |
| Inferior Inner |                  |                |               |                    |             |                   |
| Retina         | 323.72 (21.65)   | 318.21 (23.45) | 328.9 (22.81) | 0.193              | 0.44        | 0.464             |

|                |                |                |                |        |        |        |
|----------------|----------------|----------------|----------------|--------|--------|--------|
| NFL            | 18.44 (2.08)   | 19.29 (2.43)   | 19.7 (5.57)    | 0.77   | 0.347  | 0.259  |
| GCL            | 43.72 (11.49)  | 39.64 (11.84)  | 43 (7.11)      | 0.355  | 0.798  | 0.3    |
| IPL            | 37.12 (6.8)    | 34.64 (6.51)   | 37.75 (5.59)   | 0.146  | 0.74   | 0.275  |
| INL            | 38.64 (4.14)   | 39.29 (4.79)   | 41.25 (3.18)   | 0.16   | 0.025* | 0.661  |
| OPL            | 37.84 (8.82)   | 36.86 (8.06)   | 40.05 (10.63)  | 0.351  | 0.45   | 0.733  |
| ONL            | 65.2 (14.21)   | 63.79 (11.19)  | 62.4 (14.66)   | 0.768  | 0.521  | 0.751  |
| RPE            | 16.2 (2.72)    | 18.5 (4.03)    | 18.65 (5.45)   | 0.931  | 0.078  | 0.04*  |
| Temporal Inner |                |                |                |        |        |        |
| Retina         | 314.52 (19.62) | 312.43 (19.05) | 324.05 (23.38) | 0.135  | 0.144  | 0.749  |
| NFL            | 17.36 (1.8)    | 18.21 (2.04)   | 18.45 (2.39)   | 0.767  | 0.088  | 0.184  |
| GCL            | 36.2 (9.85)    | 33.14 (10.15)  | 37.25 (7.61)   | 0.187  | 0.697  | 0.364  |
| IPL            | 34.52 (5.97)   | 32.14 (5.11)   | 35.8 (5.15)    | 0.049* | 0.452  | 0.218  |
| INL            | 35.44 (4.05)   | 35.43 (4.7)    | 36.9 (3.63)    | 0.31   | 0.215  | 0.994  |
| OPL            | 32.76 (5.8)    | 29.71 (7.5)    | 31.2 (4.91)    | 0.489  | 0.343  | 0.166  |
| ONL            | 74.2 (14.26)   | 76.07 (9.03)   | 74.15 (15.63)  | 0.654  | 0.991  | 0.661  |
| RPE            | 16.24 (2.18)   | 20.14 (4.9)    | 25.1 (13.13)   | 0.135  | 0.007* | 0.012* |
| Superior Outer |                |                |                |        |        |        |
| Retina         | 320.76 (22.73) | 315.79 (19.49) | 332.25 (20.94) | 0.027* | 0.088  | 0.496  |
| NFL            | 28.48 (5.53)   | 26.5 (5.67)    | 27.3 (5.92)    | 0.696  | 0.494  | 0.295  |
| GCL            | 45 (8.37)      | 41.36 (8.29)   | 45.45 (6.09)   | 0.106  | 0.841  | 0.199  |
| IPL            | 35.64 (5.24)   | 33.14 (4.7)    | 36.5 (4.64)    | 0.047* | 0.568  | 0.148  |
| INL            | 37.76 (2.8)    | 38.86 (2.41)   | 41.5 (3.71)    | 0.026* | 0*     | 0.227  |
| OPL            | 30.12 (3.24)   | 32.14 (6.05)   | 36.2 (9.66)    | 0.174  | 0.013* | 0.261  |
| ONL            | 60.92 (12.7)   | 62 (10.36)     | 60.5 (12.16)   | 0.71   | 0.911  | 0.788  |
| RPE            | 16.2 (2.87)    | 16.93 (4.53)   | 18.75 (4.94)   | 0.282  | 0.05*  | 0.542  |
| Nasal Outer    |                |                |                |        |        |        |
| Retina         | 332.92 (21.66) | 325.79 (24.5)  | 338.1 (17.15)  | 0.094  | 0.388  | 0.353  |
| NFL            | 23.96 (3.81)   | 24.07 (5.78)   | 23.8 (5.92)    | 0.895  | 0.917  | 0.943  |
| GCL            | 49.8 (8.44)    | 44.21 (8.98)   | 46.85 (6.23)   | 0.319  | 0.199  | 0.06   |
| IPL            | 39.68 (5.19)   | 36.21 (5.34)   | 38.6 (4.28)    | 0.158  | 0.459  | 0.055  |
| INL            | 39.68 (3.26)   | 39.93 (2.56)   | 43.05 (3.76)   | 0.011* | 0.002* | 0.807  |
| OPL            | 32 (5.03)      | 36.5 (10.7)    | 38.4 (9.67)    | 0.593  | 0.012* | 0.157  |
| ONL            | 65.32 (14.3)   | 62.64 (15.61)  | 63.4 (10.84)   | 0.868  | 0.622  | 0.591  |
| RPE            | 15.84 (2.73)   | 16.14 (3.39)   | 17.3 (4.17)    | 0.398  | 0.165  | 0.763  |
| Inferior Outer |                |                |                |        |        |        |
| Retina         | NA (NA)        | 315.86 (22.49) | 328.75 (18.71) | 0.078  | 0.111  | 0.723  |

|                       |                |                |                |        |        |       |
|-----------------------|----------------|----------------|----------------|--------|--------|-------|
| NFL                   | 28.44 (6.97)   | 28.14 (6.71)   | 28 (6.57)      | 0.951  | 0.83   | 0.898 |
| GCL                   | 43.36 (9.63)   | 39.93 (8.56)   | 45.15 (7.37)   | 0.066  | 0.497  | 0.274 |
| IPL                   | 34.88 (6.29)   | 33 (6.16)      | 36.35 (4.18)   | 0.068  | 0.374  | 0.373 |
| INL                   | 38.32 (3.02)   | 39.29 (2.73)   | 41.35 (3.95)   | 0.101  | 0.006* | 0.329 |
| OPL                   | 31.12 (3.82)   | 34 (6.84)      | 37.2 (10.01)   | 0.308  | 0.017* | 0.164 |
| ONL                   | 60.64 (9.5)    | 59.64 (10.68)  | 58.1 (10.87)   | 0.684  | 0.408  | 0.765 |
| RPE                   | 16.76 (6.23)   | 16 (3.14)      | 17.7 (4.45)    | 0.228  | 0.573  | 0.616 |
| Temporal Outer Retina | 315.32 (19.82) | 312.21 (17.97) | 326.35 (19.29) | 0.038* | 0.067  | 0.631 |
| NFL                   | 18.28 (1.65)   | 19.21 (2.12)   | 19.6 (3.2)     | 0.697  | 0.106  | 0.134 |
| GCL                   | 42.72 (10.16)  | 38.14 (10.52)  | 43.25 (7.14)   | 0.101  | 0.844  | 0.191 |
| IPL                   | 36.96 (6.02)   | 34.29 (5.27)   | 38.25 (3.97)   | 0.018* | 0.414  | 0.173 |
| INL                   | 37.4 (3.08)    | 37.64 (2.47)   | 39.75 (2.36)   | 0.017* | 0.007* | 0.802 |
| OPL                   | 29.88 (3.83)   | 29.71 (3.07)   | 32.15 (3.77)   | 0.055  | 0.053  | 0.891 |
| ONL                   | 67.88 (11.24)  | 67.71 (6.35)   | 66.95 (12.07)  | 0.812  | 0.791  | 0.953 |
| RPE                   | 15.08 (2.08)   | 18.43 (7.43)   | 20.8 (9.34)    | 0.436  | 0.014* | 0.121 |

*ETDRS* = Early treatment diabetic retinopathy study; *RPD* = Reticular pseudodrusen; *iAMD* = Intermediate dry age-related macular degeneration; *NFL* = Nerve fiber layer; *GCL* = Ganglion cell layer; *IPL* = Inner plexiform layer; *INL* = Inner nuclear layer; *OPL* = Outer plexiform layer; *ONL* = Outer nuclear layer; *RPE* = Retinal pigment epithelium
